# Supplementary material for: The Effect of Bicarbonate Administration via Continuous Venovenous Hemofiltration on Acid-Base Parameters in Ventilated Patients
Source: Hindawi journal article supplement (doi:10.1155/2015/901590), 2015-01-01

**Supplementary Figure.** Changes in mean partial arterial pressure of carbon dioxide ( $p\text{CO}_2$ ) and serum bicarbonate ( $\text{HCO}_3$ ) over time

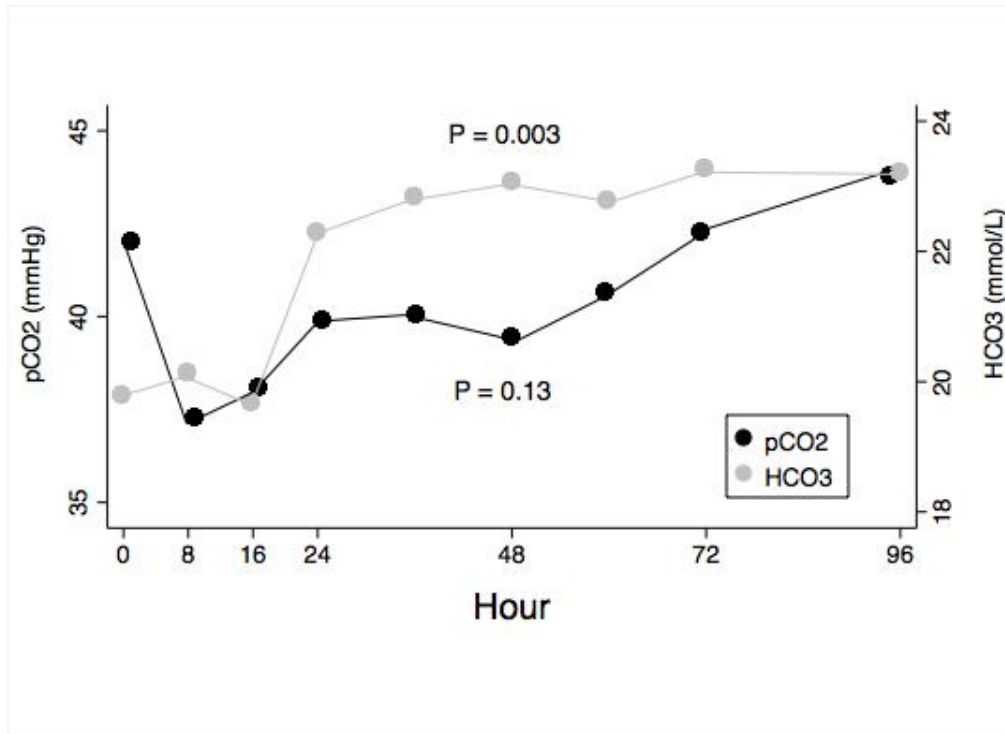

Supplement: f1 [file 901590.f1.pdf]
